# Supplementary material for: Simultaneous determination of 16 fluoroquinolone antibiotics in cosmetics by ultra-performance liquid chromatography/triple quadrupole mass spectrometry with ultrasound-assisted extraction and solid-phase extraction
Source: Royal Society of Chemistry journal article supplement (doi:10.1039/c4ay02061h), 2014-11-19
Supplement: c4ay02061h1.pdf [file c4ay02061h1.pdf]

### Supporting Information

#### **Simultaneous determination of sixteen fluoroquinolone antibiotics in cosmetics by ultra-performance liquid chromatography/triple quadrupole mass spectrometry with ultrasound-assisted extraction and solid-phase extraction**

Xianshuang Meng,<sup>a</sup> Qiang Ma,<sup>\*a,b</sup> Qing Zhang,<sup>a</sup> Qing Lv,<sup>a</sup> Yunxia Chen,<sup>a</sup> Hua Bai<sup>a</sup> and Chao Wang<sup>a</sup>

<sup>a</sup> *Chinese Academy of Inspection and Quarantine, No. A3, Gaobeidian North Road, Chaoyang District, Beijing 100123, China*

<sup>b</sup> *Weldon School of Biomedical Engineering, Purdue University, 206 South Martin Jischke Drive, West Lafayette, IN 47907, USA.*

\* Corresponding Author

Prof. Qiang Ma

Chinese Academy of Inspection and Quarantine

No. A3, Gaobeidian North Road, Chaoyang District, Beijing 100123, China

E-mail: maqiang@caiq.gov.cn

**Table S1** Basic information about the 16 FQs involved in this study

| Fluoroquinolones | Abbreviation | Formula                                                                      | Mw     | CAS No.     | Supplier           |
|------------------|--------------|------------------------------------------------------------------------------|--------|-------------|--------------------|
| Marbofloxacin    | MAR          | C <sub>17</sub> H <sub>19</sub> FN <sub>4</sub> O <sub>4</sub>               | 362.36 | 11150-35-1  | Dr. Ehrenstorfer   |
| Fleroxacin       | FLE          | C <sub>17</sub> H <sub>18</sub> F <sub>3</sub> N <sub>3</sub> O <sub>3</sub> | 369.34 | 79660-72-3  | NIFDC <sup>a</sup> |
| Enoxacin         | ENO          | C <sub>15</sub> H <sub>17</sub> FN <sub>4</sub> O <sub>3</sub>               | 320.32 | 74011-58-8  | NIFDC <sup>a</sup> |
| Pazufloxacin     | PAZ          | C <sub>16</sub> H <sub>15</sub> FN <sub>2</sub> O <sub>4</sub>               | 318.30 | 127045-41-4 | Sigma-Aldrich      |
| Ofloxacin        | OFL          | C <sub>18</sub> H <sub>20</sub> FN <sub>3</sub> O <sub>4</sub>               | 361.37 | 82419-36-1  | NIFDC <sup>a</sup> |
| Pefloxacin       | PEF          | C <sub>17</sub> H <sub>20</sub> FN <sub>3</sub> O <sub>3</sub>               | 333.36 | 70458-92-3  | NIFDC <sup>a</sup> |
| Norfloxacin      | NOR          | C <sub>16</sub> H <sub>18</sub> FN <sub>3</sub> O <sub>3</sub>               | 319.24 | 70458-96-7  | Dr. Ehrenstorfer   |
| Ciprofloxacin    | CIP          | C <sub>17</sub> H <sub>18</sub> FN <sub>3</sub> O <sub>3</sub>               | 331.35 | 85721-33-1  | Dr. Ehrenstorfer   |
| Danofloxacin     | DAN          | C <sub>19</sub> H <sub>20</sub> FN <sub>3</sub> O <sub>3</sub>               | 357.38 | 112398-08-0 | Dr. Ehrenstorfer   |
| Lomefloxacin     | LOM          | C <sub>17</sub> H <sub>19</sub> F <sub>2</sub> N <sub>3</sub> O <sub>3</sub> | 353.36 | 98079-51-7  | Dr. Ehrenstorfer   |
| Enrofloxacin     | ENR          | C <sub>19</sub> H <sub>22</sub> FN <sub>3</sub> O <sub>3</sub>               | 359.40 | 93106-60-6  | Dr. Ehrenstorfer   |
| Difloxain        | DIF          | C <sub>12</sub> H <sub>19</sub> F <sub>2</sub> N <sub>3</sub> O <sub>3</sub> | 399.39 | 98106-17-3  | Dr. Ehrenstorfer   |
| Sarafloxacin     | SAR          | C <sub>20</sub> H <sub>17</sub> F <sub>2</sub> N <sub>3</sub> O <sub>3</sub> | 385.36 | 98105-99-8  | Dr. Ehrenstorfer   |
| Gatifloxacin     | GAT          | C <sub>19</sub> H <sub>22</sub> FN <sub>3</sub> O <sub>4</sub>               | 375.39 | 112811-59-3 | NIFDC <sup>a</sup> |
| Sparfloxacin     | SPA          | C <sub>19</sub> H <sub>22</sub> F <sub>2</sub> N <sub>4</sub> O <sub>3</sub> | 392.40 | 111542-93-9 | Dr. Ehrenstorfer   |
| Moxifloxacin     | MOX          | C <sub>21</sub> H <sub>24</sub> FN <sub>3</sub> O <sub>4</sub>               | 401.43 | 151096-09-2 | Sigma-Aldrich      |

<sup>a</sup> NIFDC - National Institute for Food and Drug Control

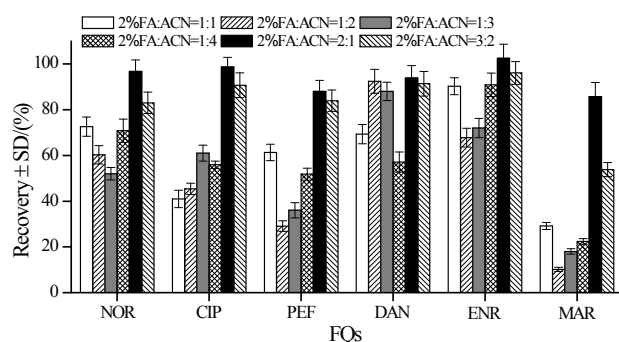**Fig. S1** Extraction yield of six selected FQs obtained when mixtures of 2% aqueous formic acid solution and acetonitrile in different proportions ( $n=3$ ) were used as extraction solvent.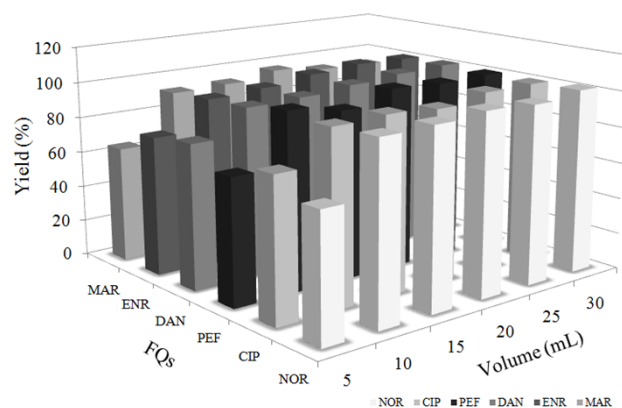**Fig. S2** Influence of liquid-to-solid ratio on the extraction yield of six selected FQs.

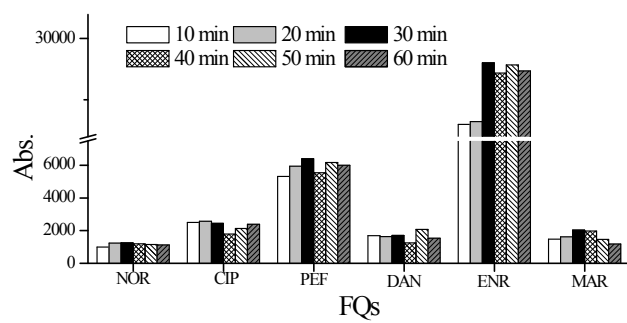

**Fig. S3** Influence of extraction duration on the signal responses of six selected FQs when 2% aqueous formic acid solution-acetonitrile (2:1) was used as the extraction solvent.
